# Supplementary material
Source: publisher site journal article supplement (https://www.dovepress.com/get_supplementary_file.php?f=301622.docx)
Supplement: Supplementary file 1 [file get_supplementary_file.php]

**Antimicrobial peptides SLPI and beta defensin-1 in sputum are negatively correlated with FEV1**

Supplementary tables and figures

Jennifer L Cane1,2, Laura J Tregidgo1, Samantha J Thulborn1,2, Donna Finch3, Mona Bafadhel1,2

1Respiratory Medicine Unit, Nuffield Department of Medicine, University of Oxford, UK

2Oxford NIHR Biomedical Research Centre, University of Oxford, UK

3Alchemab Therapeutics, Cambridge, UK

|  | **Age (median, IQR)** | **Sex (M/F)** | **Race (Caucasian/Black)** | **Ever smoker** |
| --- | --- | --- | --- | --- |
| COPD (n=3) | 66 (59-73) | 100/0 | 100/0 | 100% |
| Health (n=3) | 57 (56-69) | 33/67 | 67/33 | 0 |

**Table E1:** Characteristics of HBEC donors

**Table E2**: Peptide levels in sputum supernatants of patients with COPD (n=14) and asthma (n=21) grouped into those with high sputum neutrophils (≥70%), and those with <70% sputum neutrophils.

|  | SLPI (ng/ml) | Osteopontin (pg/ml) | Elafin (ng/ml) | Beta defensin-1 (ng/ml) |
| --- | --- | --- | --- | --- |
| <70% neutrophils | 324.6 (203.6-517.4) | 181.2 (89.93-365) | 19.64 (13.4-28.79) | 6.001 (3.5-10.29) |
| ≥70% neutrophils | 614.7 (320.2-1180) | 227 (108.8-473.6) | 19.82 (13.7-28.66) | 11.5 (5.703-23.39) |
| p value | 0.178 | 0.495 | 0.798 | 0.095 |


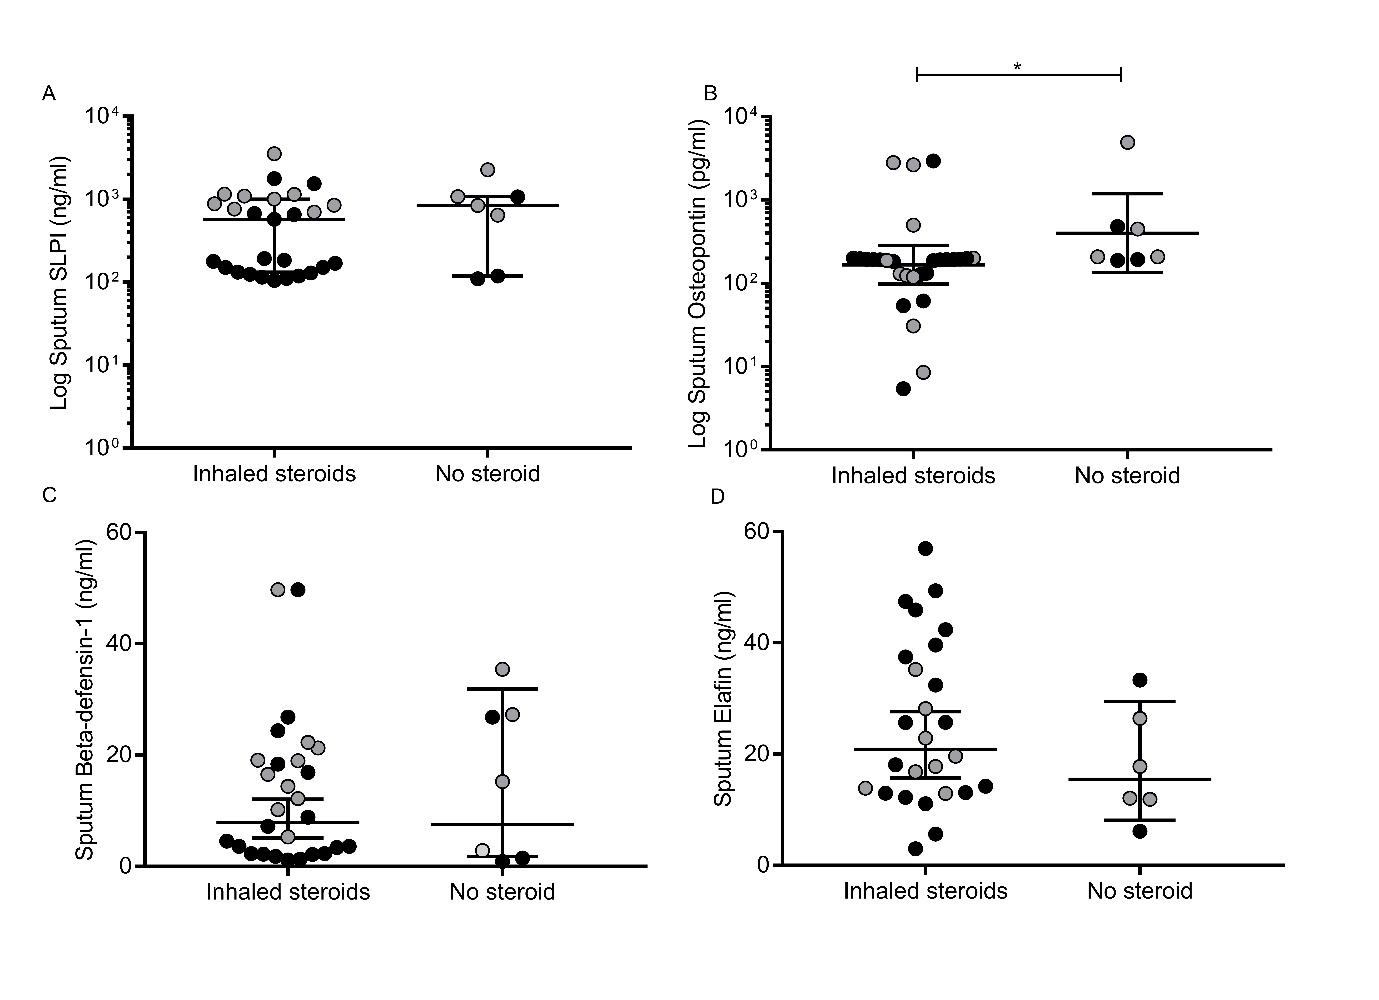


Figure E1


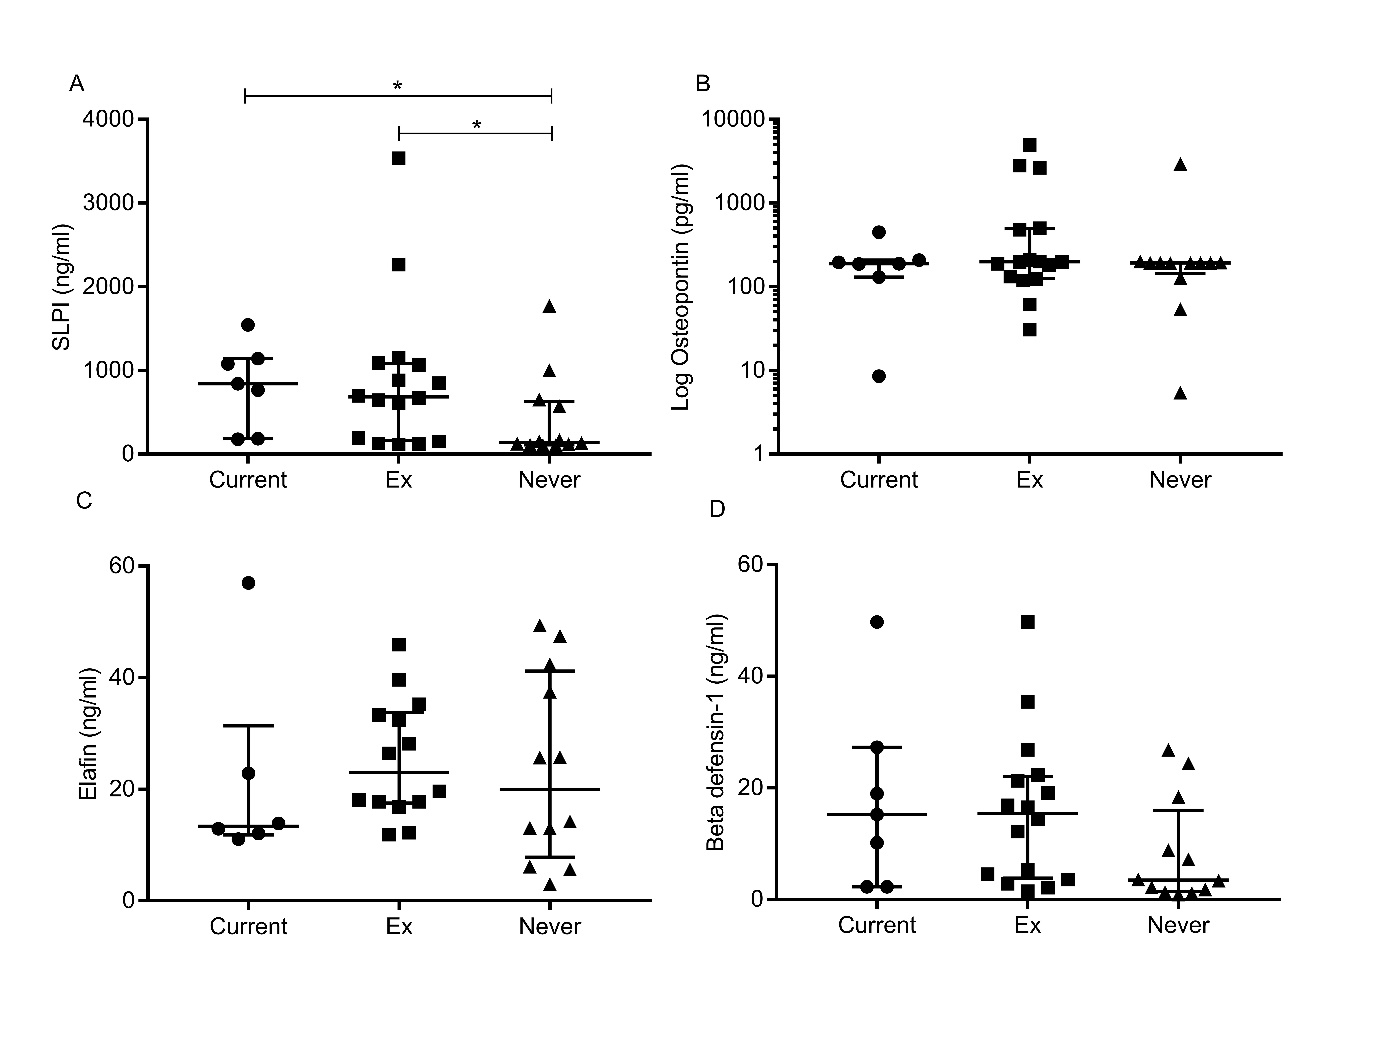
Figure E2


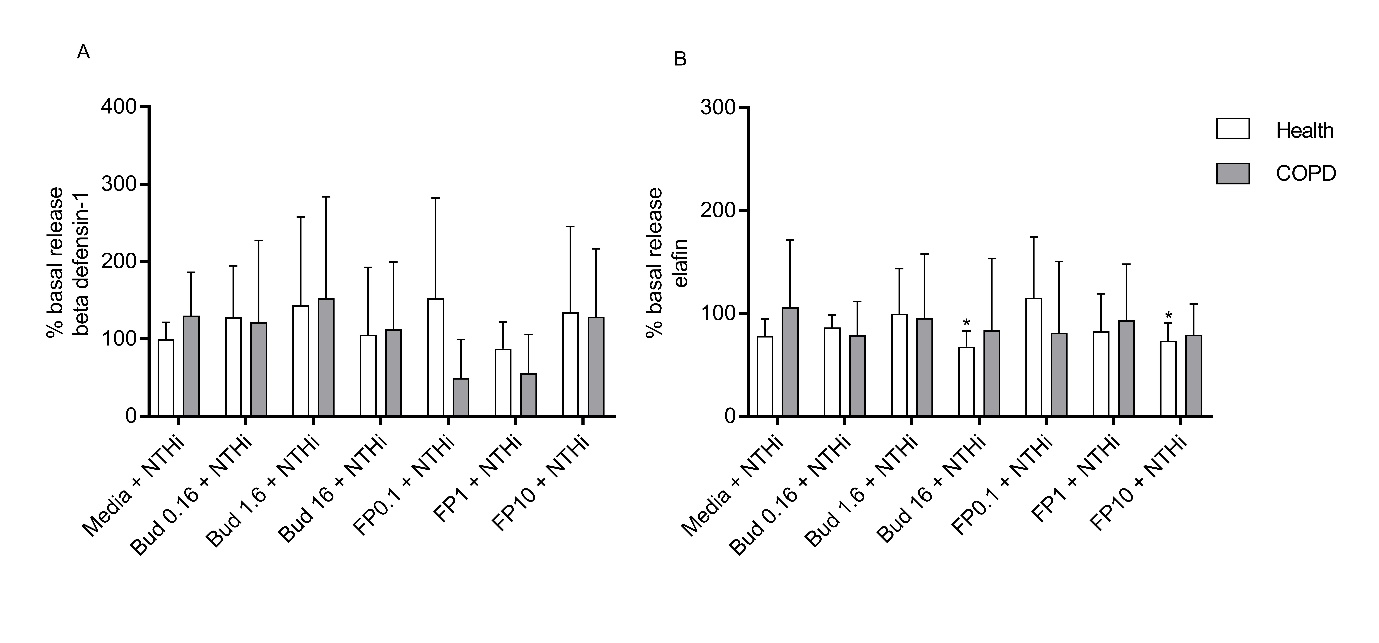
Figure E3


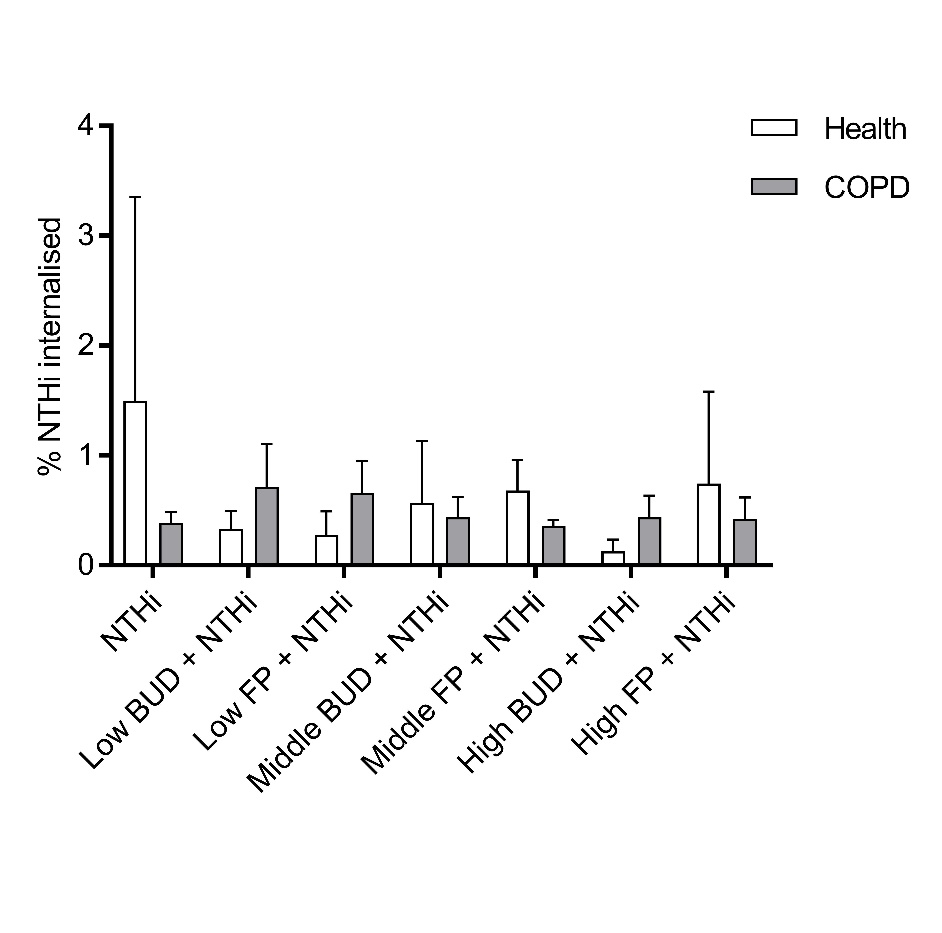


Figure E4


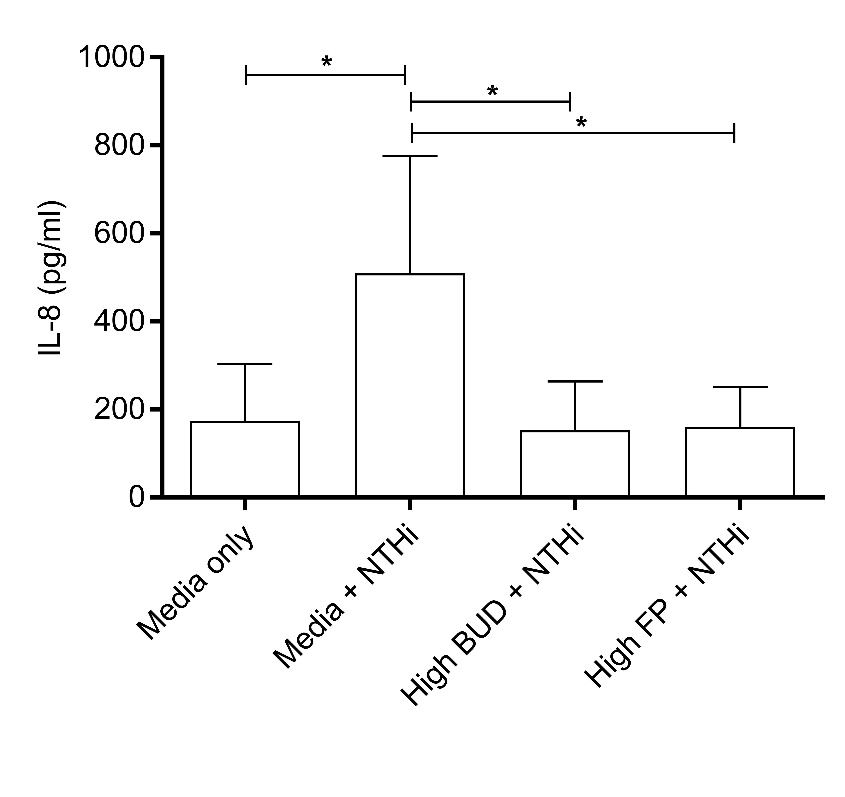


Figure E5

**Figure E1:** Sputum peptide levels in patients with COPD (n=14, grey dots) and asthma (n=21, black dots), tested in duplicate. A: SLPI, B: osteopontin, C: elafin and D: beta defensin-1. * denotes p<0.05.

**Figure E2:** Sputum peptide levels grouped according to smoking status of participants with COPD (n=14) or asthma (n=21), tested in duplicate. A: SLPI, B: osteopontin, C: elafin and D: beta defensin-1. * denotes p<0.05.

**Figure E3:** A: Beta defensin-1 and B: Elafin release with a combination of NTHi and steroid treatments. Results are shown as a mean percentage change from untreated cell release. Donors: health (n=3, white bars) and COPD (n=3, grey bars). Budesonide (Bud) levels tested: 0.16nM, 1.6nM and 16nM, and fluticasone propionate (FP) levels tested: 0.1nM, 1nM and 10nM in cell media. Significant changes form basal release shown as * p<0.05.

**Figure E4:** Amount of NTHi internalised into HBECs, shown as a mean percentage and SD of all NTHi added. Donors: health (n=3, white bars), COPD (n=3, grey bars), tested in duplicate.

**Figure E5:** IL-8 release from HBECs from healthy donors (n=3) was increased after two hours of treatment with NTHi, and that increase was prevented with treatment with budesonide or fluticasone prior to infection. Tests were run in duplicate. * denotes p<0.05.
